# Supplementary material
Source: PubMed Central journal article supplement (PMC3770083)
Supplement: supp_M038802_jlr.M038802-1.pdf [file supp_M038802_jlr.M038802-1.pdf]

# Supplemental Figure 1

|            | 700 |   |   |   |   |   |   |   |   |   | 710 |   |   |   |   |   |   |   |   |   |   |   |   |   |   |   |   |   |   |   |   |   |
|------------|-----|---|---|---|---|---|---|---|---|---|-----|---|---|---|---|---|---|---|---|---|---|---|---|---|---|---|---|---|---|---|---|---|
| Human mRNA | C   | A | G | G | A | C | A | T | G | A | T   | G | A | C | C | A | A | C | T | C | T | G | G | C | T | T | G | T | T | A | T | G |
| Mouse mRNA | C   | A | G | G | A | C | A | T | G | A | T   | G | A | C | C | A | A | C | T | C | T | G | G | C | T | T | G | T | T | A | T | G |
| siRNA      | -   | - | - | - | - | - | - | - | - | - | -   | G | A | C | C | A | A | C | T | C | T | G | G | C | T | T | G | T | T | A | - | - |
| Consensus  | C   | A | G | G | A | C | A | T | G | A | T   | G | A | C | C | A | A | C | T | C | T | G | G | C | T | T | G | T | T | A | T | G |
