# Supplementary material
Source: PubMed Central journal article supplement (PMC3770083)
Supplement: supp_M038802_jlr.M038802-5.pdf [file supp_M038802_jlr.M038802-5.pdf]

**Supplemental Figure 1. Map4k4 siRNA sequence targets both human and mouse Map4k4 mRNA.** Human and mouse Map4k4 mRNA sequences as well as siRNA used throughout the study were aligned using MacVector.

**Supplemental Figure 2. Map4k4 kinase inactivity results in increased Srebp-1 protein levels.** (A) Mature 3T3-L1 adipocytes were infected with control virus or dead-kinase virus. 72 hrs post-infection, cells were serum starved for 2hr and treated with 1  $\mu$ M insulin added for 3.5 hr. (B) Quantification of A. Data is representative of three independent experiments.

**Supplemental Figure 3. Increased Map4k4 expression and activity decreases lipid synthesis.** (A) Srebp-1 protein immunoblots of control and Map4k4-overexpressing adipocytes treated with 1  $\mu$ M insulin for 3.4 hr (N=4). (B) RT-qPCR analysis of lipogenic gene expression in control and Map4k4-overexpressing adipocytes (N=4). (C) Quantification of A. Data are presented as average  $\pm$  SE and were compared between groups by Student's T-test. \* P<. 01, \*\* P<. 001, \*\*\* P<. 0001.

**Supplemental Figure 4. Ectopic JNK and Map4k4 expression enhances JNK signaling.** (A) Protein immunoblots depicting JNK activation in response to 50ng/mL TNF $\alpha$  in HEK 293T cells transfected with equal amounts of empty vector, HA-Map4k4, Flag- JNK1 or Flag- JNK2 constructs (N=3). (B) Quantification of (A). (C) Map4k4 was depleted in HEK 293T cells using siRNA and cells were stimulated with 1 ng/mL and 50 ng/mL TNF $\alpha$  for 15 min. Protein immunoblots depicting JNK activation are shown (N=3).
