# Supplementary material
Source: PubMed Central journal article supplement (PMC3770083)

# Supplemental Figure 2

**A**

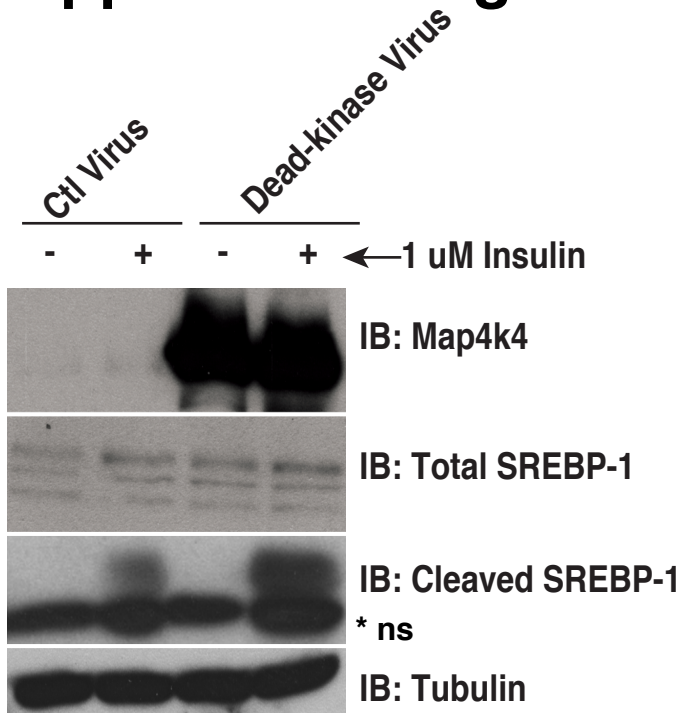

**B**

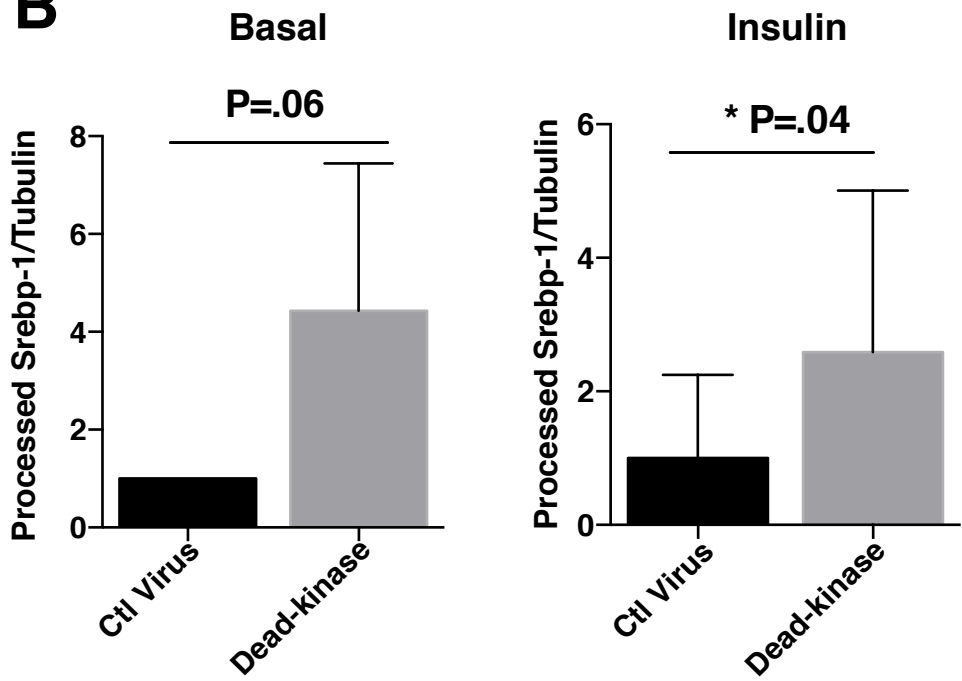

Supplement: supp_M038802_jlr.M038802-2.pdf [file supp_M038802_jlr.M038802-2.pdf]

# Supplemental Figure 3

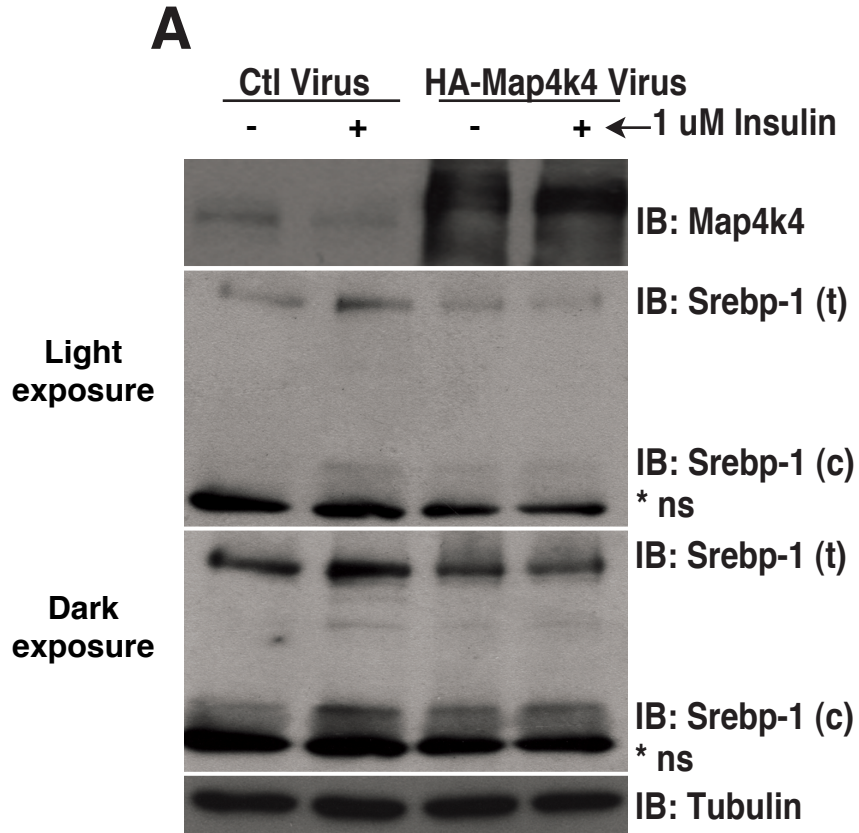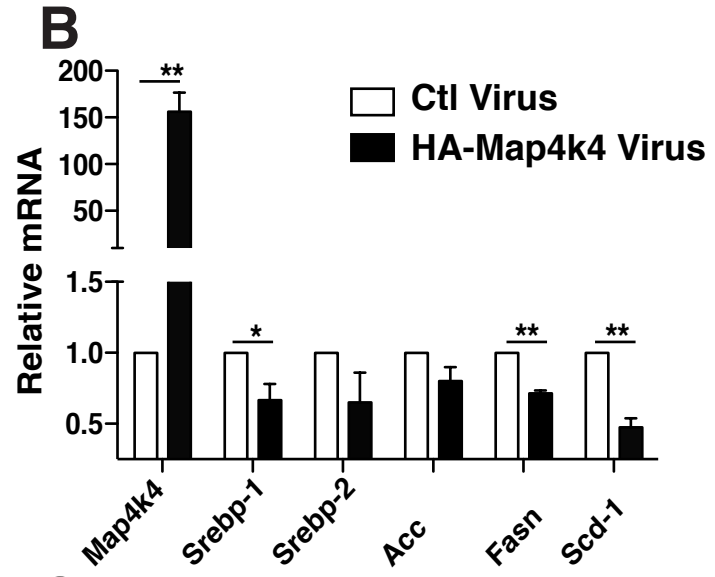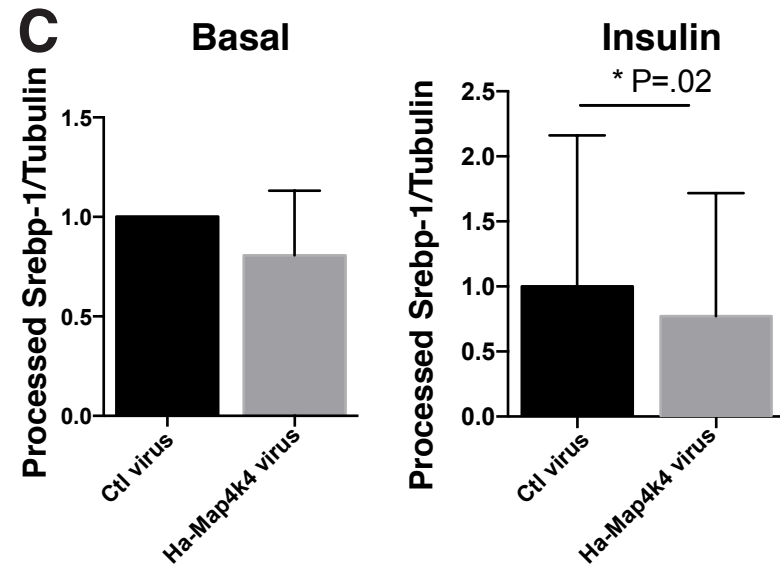

Supplement: supp_M038802_jlr.M038802-3.pdf [file supp_M038802_jlr.M038802-3.pdf]

# Supplemental Figure 4

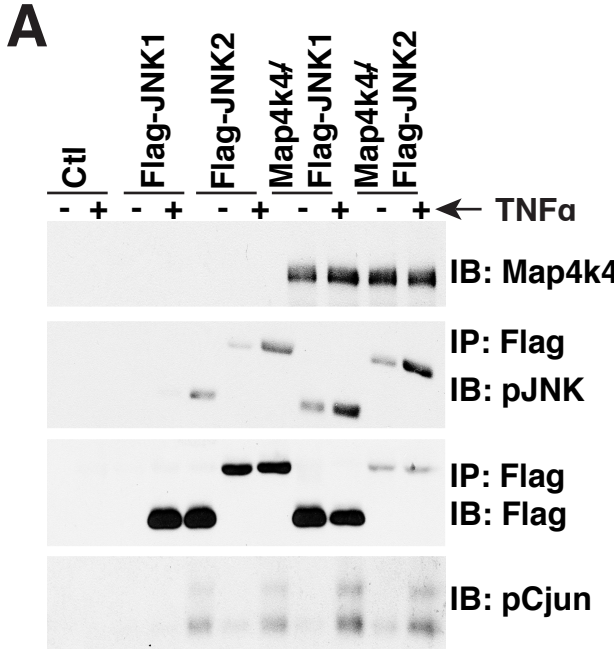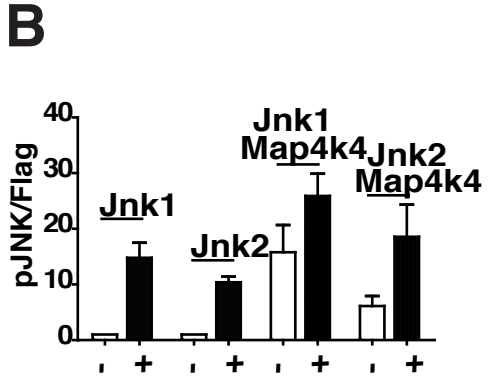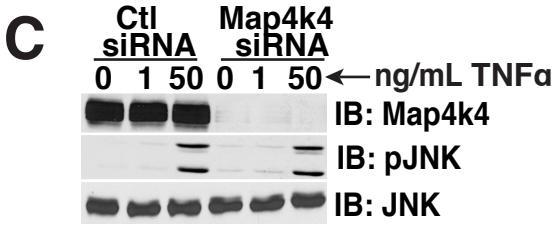

Supplement: supp_M038802_jlr.M038802-4.pdf [file supp_M038802_jlr.M038802-4.pdf]
